# **Cationic Peptides Facilitate Iron-induced Mutagenesis in Bacteria**

Alexandro Rodríguez-Rojas\*, Olga Makarova, Uta Müller and Jens Rolff \*

Evolutionary Biology, Institute for Biology, Free University Berlin, Berlin, Germany.

\*Corresponding authors: a.rojas@fu-berlin.de, jens.rolff@fu-berlin.de. Königin-Luise-Strasse 1-3, 14195 Berlin, Germany.

**Short title:** Cationic peptides and iron mutagenesis in bacteria

# 1 Abstract

2 *Pseudomonas aeruginosa* is the causative agent of chronic respiratory infections and is  
3 an important pathogen of cystic fibrosis patients. Adaptive mutations play an essential  
4 role for antimicrobial resistance and persistence. The factors that contribute to  
5 bacterial mutagenesis in this environment are not clear. Recently it has been proposed  
6 that cationic antimicrobial peptides such as LL-37 could act as a mutagen in *P.*  
7 *aeruginosa*. Here we provide experimental evidence that mutagenesis is the product of  
8 a joint action of LL-37 and free iron. By estimating mutation rate, mutant frequencies  
9 and assessing mutational spectra in *P. aeruginosa* treated either with LL-37, iron or a  
10 combination of both we demonstrate that mutation rate and mutant frequency were  
11 increased only when free iron and LL-37 were present simultaneously. The addition of  
12 an iron chelator completely abolished this mutagenic effect, suggesting that LL-37  
13 enables iron to enter the cells resulting in DNA damage by Fenton reactions. This was  
14 also supported by the observation that the mutational spectrum of the bacteria under  
15 LL-37-iron regime showed one of the characteristic Fenton reaction fingerprints: C to T  
16 transitions. Free iron concentration in nature and within hosts is kept at a very low  
17 level, but the situation in infected lungs of cystic fibrosis patients is different.  
18 Intermittent bleeding and damage to the epithelial cells in lungs may contribute to the  
19 release of free iron that in turn leads to generation of reactive oxygen species and  
20 deterioration of the respiratory tract, making it more susceptible to the infection.

21

22

23

# 1 **Author Summary**

2 Cationic antimicrobial peptides (cAMPs) are small proteins naturally produced by the  
3 immune system to limit bacterial growth mainly through pore formation in the  
4 membrane. It has recently been suggested that sub-inhibitory concentrations of  
5 cAMPs promote bacterial mutagenesis, similarly to antibiotics. However, we previously  
6 reported that cAMPs do not increase mutation rate and do not activate bacterial stress  
7 responses. Here we resolve this contradiction. We report that free iron in the culture  
8 medium increases mutagenesis in the presence of cAMPs. We show that sub-inhibitory  
9 concentrations of cAMPs facilitate entry of free iron into bacterial cells, where it  
10 interacts with hydrogen peroxide, thereby resulting in production of DNA-damaging  
11 reactive oxygen species and increased mutagenesis. Moreover, these results may have  
12 clinically-relevant implications: while very little free iron is normally present in healthy  
13 individuals, this is not the case in patients suffering from cystic fibrosis, where elevated  
14 bacterial mutagenesis promotes antibiotic resistance and contributes to persistence  
15 and severity of infection. Thus, an intervention aimed at reduction of free iron in the  
16 lungs could reduce the cAMPs-facilitation of iron-mediated mutagenesis; hence  
17 antibiotic resistance and pathoadaptation.

18

19

20

21

22

# 1 Introduction

2 *Pseudomonas aeruginosa* is an important opportunistic pathogen involved in chronic  
3 respiratory and hospital-acquired infections [1]. In cystic fibrosis (CF) patients, one of  
4 the most common genetic diseases in humans, this bacterium causes chronic lung  
5 infections that result in significant morbidity and mortality [2]. *P. aeruginosa* infections  
6 are difficult to treat due the inherent resistance to many drug classes, its ability to  
7 acquire resistance, via mutations, to all relevant treatments and its high and increasing  
8 rates of resistance locally [3].

9 Mutagenesis plays a crucial role in adaptation of this pathogen for persistence and  
10 antibiotic resistance acquisition in CF [4], being found a high proportion of  
11 hypermutable bacteria among *P. aeruginosa* isolates [5]. Recently, Limoli *et al* [6]  
12 reported an increased mutant frequency after treatment of *P. aeruginosa* with the  
13 human cationic peptide LL-37. Based on this finding they proposed that cationic  
14 peptides elevated bacterial mutation rates. In a recent study, we reported mutation  
15 rates of *E. coli* in the presence of cationic antimicrobial peptides (cAMPs) and  
16 antibiotics. LL-37 was present in the panel of AMPs that we tested and we did not find  
17 any increase in mutation rates. We also used transcription reporter assays and qRT-  
18 PCR and showed that none of the AMPs elicited the main mutagenic stress pathways  
19 of bacteria SOS or *rpoS* [7].

20 Here, we aim to resolve this apparent contradiction based on the observation that the  
21 different studies used different media. Limoli *et al.* [6] used M63 for *P. aeruginosa* and  
22 LB for *E. coli*, while we used non-cation adjusted Mueller-Hinton Broth (MHB),  
23 commonly used for cAMP susceptibility testing . The most striking difference in culture

media between the two studies is that both, M63 [8] and LB are iron-rich [9,10], while MHB is not [11].  $\text{Fe}^{2+}$  catalyses hydroxyl radical formation by reacting with hydrogen peroxide both intra- and extra-cellularly, the Fenton reaction [12]. Without free iron hydrogen peroxide reactivity is low at physiological pH and iron metabolism is strictly controlled to avoid DNA and other damage caused by oxygen radicals [13,14]. In most natural situations iron is in short supply, but in cystic fibrosis [15,16] due to accult bleeding of highly vascularised lung tissue and haemoptysis particularly during acute exacerbations, and damage of the respiratory tract epithelium where  $\text{Fe}^{2+}$  is present intermittently. Although ferrous iron is prone to oxidation, the anaerobic growth of at to high density of bacteria [17] may contribute to stabilise this metal in the reduced state.

Many cationic antimicrobial peptides change membrane permeability properties [18], and this led us to hypothesize that sub-inhibitory concentrations of LL-37 increase uncontrolled iron transport from the extracellular space to the cytoplasm without the intervention of the bacterial iron trafficking system. An intracellular surplus of iron should then result in DNA damage caused by the Fenton reaction.

Here, we (i) estimate the mutation rate of *P. aeruginosa* in the presence of LL-37, iron or both; (ii) we then investigate the hypothesis that ferrous iron ( $\text{Fe}^{+2}$ ) is causal to an increase in mutation rate and that LL-37 facilitates this process, something that is true for colistin too; and finally (iii) we investigate the mutational spectra to find out if promoted mutations match with any of the molecular signatures of Fenton reactions.

22

23

# 1 Results and Discussion

## 2 Mutation rate is increased in the presence of ferrous $\text{Fe}^{2+}$ and LL-37

3 First we determined the mutation rate of *P. aeruginosa* using a fluctuation assay, in  
 4 the presence of either LL-37 (32  $\mu\text{g/ml}$ ),  $\text{Fe}^{2+}$  (40 $\mu\text{M}$ ), or both (figure 1). Mutation rate  
 5 was only increased when LL-37 and  $\text{Fe}^{2+}$  were added simultaneously, while addition of  
 6 LL-37 or  $\text{Fe}^{2+}$  separately did not produce the same effect. To investigate the effect of  
 7 different concentrations of LL-37 and  $\text{Fe}^{2+}$ , we estimated mutant frequencies. None of  
 8 the LL-37 concentrations tested, ranging from 4 to 32  $\mu\text{g/ml}$ , yielded any detectable  
 9 changes in mutant frequency (figure S1).  $\text{Fe}^{2+}$  alone, at different concentrations, also  
 10 did not increase the mutant frequencies in comparison with the control group (figure  
 11 S2).

12  
 13 **Figure 1. The joint action of LL-37 and ferrous ions induces an increase in the**  
 14 **mutation rate of *P. aeruginosa*.** No changes occur when LL-37 or iron are added to the  
 15 culture separately. Error bars represent 95 % confidence intervals for mutation rates.

16 Subsequently, we assayed the MIC50 (32  $\mu\text{g/ml}$ ) of LL-37 with several iron  
 17 concentrations and measured the impact on rifampicin mutant frequency of *P.*  
 18 *aeruginosa* strain PAO1. We found that added concentrations of 10, 20, 40 and 80  $\mu\text{M}$   
 19 of  $\text{Fe}^{2+}$ , increased the mutant frequency between three to five times (figure S3).

20 Limoli *et al.* [6] observed increased mutant frequencies in both, *P. aeruginosa* and *E.*  
 21 *coli*, proposing that LL-37 induces mutagenesis in these bacteria. Taken at face value,  
 22 this contrasts with our work, where we did not find such effect in *E. coli* [7]. *P.*  
 23 *aeruginosa* in the Limoli *et al.* study however, was cultured in an iron-rich medium,

1 M63 [8], which contains 0.5 mg of iron sulphate per litre ( $\text{Fe}^{2+}$ ). To confirm the results  
 2 in a different bacterial model, the experiment was repeated with *E. coli* using LB as a  
 3 culture medium. However, LB is also iron-rich (~16  $\mu\text{M}$  of iron) [9,10]. In these  
 4 experiments, just before the treatment with LL-37 in a saline solution, bacteria were  
 5 washed. It has, however, been shown that Gram-negative bacteria can actively  
 6 accumulate iron in the periplasmic space [19]. This led us to hypothesise that sub-  
 7 lethal concentrations of cationic antimicrobial peptides can facilitate iron transport  
 8 into the cells.

#### 10 **LL-37 facilitates mutagenesis but iron is causal**

11 To confirm that iron is causing the observed increase in mutagenesis, we first repeated  
 12 the assay in the presence of an iron chelator, 2-2' bipyridyl. 2-2' bipyridyl completely  
 13 abolished the increase in mutant frequency in the tested concentration of LL-37+ $\text{Fe}^{2+}$   
 14 combination. The sole action of the chelator plus  $\text{Fe}^{2+}$  did not increase the mutant  
 15 frequency (figure 2).

17 **Figure 2. The mutagenesis of LL-37+ $\text{Fe}^{2+}$  combination is suppressed by the addition of**  
 18 **an iron chelator.** This supports the notion that iron is causal in increasing mutagenesis  
 19 (A). In the same line, over-expression of Dps, a natural iron chelator in bacteria, also  
 20 decreases the mutant frequency to rifampicin (B). Error bars represent 95 %  
 21 confidence intervals for mutant frequencies.

22 Bacteria have a number of mechanisms to keep free iron as low as possible inside the  
 23 cell. One of these is Dps, a natural iron chelating protein. To confirm the results  
 24 obtained with 2-2' bipyridyl, we used a Dps over-expressing strain by cloning the *dps*

1 gene into a multi-copy plasmid under a constitutive promoter. The mutagenesis was  
2 not completely reverted in comparison with non-treated controls, but there was a 1.8  
3 fold-reduction (figure 2).

4 The iron uptake assay showed that there was a significant difference ( $P=0.00015$ ) in  
5 total iron content in bacterial cells between LL-37+  $\text{Fe}^{2+}$  ( $17.50 \pm 5.10$  nmoles/ml, mean  
6  $\pm$  standard deviation) and iron alone ( $5.65 \pm 4.13$  nmoles/ml, mean  $\pm$  standard  
7 deviation) treatments after 30 minutes of incubation, indicating that LL-37 indeed  
8 promotes a non-physiological free iron entrance.

9 We also tested a further AMP: Colistin, which is of bacterial origin, and is one of the  
10 most effective agents against *P. aeruginosa* in CF infections [20]. We treated cultures  
11 of *P. aeruginosa* PAO1 with MIC50 of colistin ( $1.8 \mu\text{g/ml}$ ) in high and low  
12 concentrations of iron in the media. The effects of colistin were very similar to the  
13 effects we found for LL-37 (figure 3). Although the mechanism of action of colistin is  
14 not fully understood [21], our results suggest pore forming mechanism or permeability  
15 changes in the cell as likely mechanisms. It has been demonstrated that colistin  
16 promotes the uptake of hydrophilic antibiotics, explaining their synergism with them  
17 [22].

18 **Figure 3. Mutagenesis induced by colistin and  $\text{Fe}^{2+}$  combination.** The mutation rate is  
19 only increased if both, iron and colistin, are present. Error bars represent 95 %  
20 confidence intervals for mutation rates.

21 Previous work has suggested that iron is involved in *Pseudomonas aeruginosa*  
22 pathoadaptation and antibiotic resistance acquisition [15]. All experiments were  
23 carried out with the more soluble  $\text{Fe}^{2+}$  because ferrous iron is abundant in the CF lung



1 (~39  $\mu$ M on average for severely ill patients) and significantly correlates with disease  
 2 severity [23]. Moreover, iron activates the two-component signal transduction system  
 3 BqsRS in *P. aeruginosa*, which is transcriptionally active in CF sputum, and promotes  
 4 tolerance to cationic stressors [24]. This increases the tolerance to both host peptides  
 5 such as LL-37 and colistine, which is administered in CF therapy.

6 The new mechanism proposed here has almost certainly important implications. Under  
 7 specific pathologies such as cystic fibrosis or other respiratory chronic diseases, iron  
 8 that is usually in short supply, is abundant. Disturbances in iron metabolism have been  
 9 shown to promote evolution of antibiotic resistance in *E. coli* [25]. Given that cationic  
 10 antimicrobial peptides usually induce membrane permeability in all susceptible  
 11 microbes and Fenton chemistry is universal, the mechanism we propose here is likely  
 12 applicable to other AMPs. For example, beta-defensin-2 was shown to double the  
 13 mucoid conversion rate, a mutagenic process, of *P. aeruginosa* [6]. Yet free iron is  
 14 rarely available in most physiological situations but for a few pathologies such as cystic  
 15 fibrosis

16 Additionally, it has been reported that some cationic antimicrobial peptides interact  
 17 with bacterial membrane proteins and delocalise them [26]. It is conceivable then that  
 18 LL-37 may interact and interfere with iron transport systems, which in turn may  
 19 contribute to iron homeostasis disruption and enhance mutagenesis. This possibility  
 20 requires additional investigation and will be the goal for future studies.

21 In the context of cystic fibrosis, the increase in salt concentration may lead to the  
 22 reduced activity or complete inactivation of other antimicrobial peptides, as observed  
 23 for human beta-defensin-1 [27], while other components could eventually contribute  
 24 to mutagenesis in the same way that LL-37 does. Moreover, the PhoP-PhoQ and PmrA-

1 PmrB two-component regulatory systems of *P. aeruginosa* may play an important role  
 2 in antimicrobial peptide tolerance. This resistance is reproduced *in vitro* when  
 3 magnesium concentrations are low [28]. Our experimental conditions, where divalent  
 4 cations are depleted or in low concentrations, seem comparable. In the light of our  
 5 results this suggest that bacteria under certain conditions that elicit the expression of  
 6 these two component systems alter the lipidA structure resulting in increased  
 7 resistance to colistin [29]. The same systems up-regulate ferrous iron uptake which is  
 8 mediated by feoAB operon [28,30]. This phenomenon could potentially contribute to  
 9 saturate intracellular iron storage systems and to generate an excess of iron that  
 10 eventually can participate in Fenton reaction operating by the mechanisms that we  
 11 propose here.

12 How would the mechanism we propose here enhance the overall mutation rate of  
 13 bacterial populations? In the context of cystic fibrosis, there is a high proportion of  
 14 hypermutable bacteria due to the inactivation of their DNA miss-match repair (MMR)  
 15 genes [31]. We may expect a synergistic effect of both types of mutagenesis as we  
 16 proposed in the past for the mutagenic effect of cystic fibrosis lung environment and  
 17 the intrinsic mutagenesis of *P. aeruginosa* [4]. It can be speculated that iron-  
 18 mutagenesis can facilitate the rise of mutator bacteria by enhancing the inactivation of  
 19 MMR genes. This could then weaken genetic constraints that impede the evolution of  
 20 bacteria to resist antibiotics by multiple pathways as previously described [32].

## 21 **Mutational spectra of iron-induced mutagenesis.**

22 The results above strongly suggest that sub-lethal concentrations of cationic  
 23 antimicrobial peptides facilitate the access of free iron to the cytoplasmic

1 compartment of *P. aeruginosa*. Given that the Fenton reaction results in DNA damage  
2 [33] and reactive oxygen species (ROS) damages to the DNA display specific molecular  
3 fingerprints, we investigated if there was evidence of the Fenton reaction effects on  
4 the mutational spectrum.

5 It would be very difficult to investigate the mutational spectrum in *rpoB* (sub-unit of  
6 RNA polymerase) that confers resistance to rifampicin in *P. aeruginosa* PAO1. This  
7 gene is essential in and detectable mutations are mostly point mutations that would  
8 constrain the analysis to a few types of changes. We therefore decided to use another  
9 strain, PA14, where mutations that confer resistance to fosfomycin are well  
10 characterized [34–36]. Resistance mutations to fosfomycin in *P. aeruginosa* PA14  
11 depend on a single non-essential locus encoding the glycerol-3-phosphate transporter  
12 GlpT, making it a much better marker for studying the entire repertoire of mutations  
13 compared to *rpoB* [36,37] [38].

14 The treatment of *P. aeruginosa* P14, which shows a similar sensitivity to LL-37 as the  
15 PAO1 strain used above, with the mutagenic combination of LL-37+Fe<sup>2+</sup> showed almost  
16 a four fold-increase in mutant frequency (figure S4).

17 To assess how addition of free iron and antimicrobial peptides affect the mutation  
18 spectrum of the *glpT* gene of PA14 strain we exposed bacteria to either free iron,  
19 antimicrobial peptide LL-37, or both. All of the resulting resistant mutants contained  
20 non-synonymous substitutions or deletions in *glpT* that potentially affect the stability  
21 of GlpT transporter and likely disrupt the function of the protein (figure 4, table S1,  
22 figures S5 and S6). LL-37+Fe<sup>2+</sup>-treated bacteria displayed striking differences in  
23 mutational spectra when compared to the other treatments (figure 4 and table S1).

1 We used Monte Carlo hypergeometric test implemented in iMARS, a mutation analysis  
2 reporting software [39], to assess the overall differences between mutational spectra.  
3 The probability of the mutational spectra to be the same stood at 0.554706 ( $P$ -value  
4 confidence limits 0.531080 – 0.578) when the iron treatment was compared to LL-37,  
5 but was below 0.0000001 when either were compared with LL-37+Fe<sup>2+</sup> treatment.  
6 Moreover, we found a mutation hotspot (R93 to W change, 10/20 clones) in the LL-  
7 37+Fe<sup>2+</sup> treatment group that was significantly ( $P=0.0004$ , two-tailed Fisher's exact-  
8 test) different from the two other treatments (tables S2, S3 and S4). This mutation  
9 hotspot is a single nucleotide transition from C to T, which is one of the most frequent  
10 types of mutations caused by ROS [40]. We found that twelve out of twenty clones  
11 from the LL-37+Fe<sup>2+</sup> condition had C to T transitions, whereas none were present in  
12 either iron or LL-37- treated bacteria (two-tailed Fisher's exact-test ( $P<0.0001$ ) (figure  
13 S7). It is striking that although several C to T mutations can potentially lead to *glpT*  
14 inactivation are in principle possible, that the majority are concentrated in a single  
15 point. Such mutation hotspots can be driven by a specific topology on the  
16 chromosome [41], or a particular sequence prone to double strand breaks resulting in  
17 mutations after repair [42]. In general, observable mutations are the results of  
18 mutation-repair balance and not all mutations are repaired with the same efficiency. A  
19 good example in *P. aeruginosa* is the mutational inactivation of the anti-sigma factor  
20 gene, *mucA*, with the mutated allele *mucA22* most prevalent (25 to 40%). This  
21 inactivation seems to be spectrum dependent [43].

22 **Figure 4. Mutation hotspots in *glpT*.** Distribution of the mutations in the 1160 bp-long  
23 fragment of *glpT* in *P. aeruginosa* PA14 fosfomycin-resistant clones treated with iron,  
24 LL-37, or a combination of both. The number of mutations (nucleotide substitutions,

1 indels) is plotted against respective nucleotide positions within the gene fragment.  
 2 Note the overlapping mutations at positions 220-225, 409 and 524 bp in iron and LL-37  
 3 treatments and absence of common mutations in LL-37+Fe<sup>2+</sup> treatment. The figure was  
 4 generated using the mutational spectrum analysis software iMARS [39].

5 Interestingly, C to T transitions were one of the most frequent types of single  
 6 nucleotides changes in the genomes of *Salmonella typhimurium* evolved to increasing  
 7 concentrations of LL-37 in modified LB medium short of sodium chloride and anions  
 8 [44], which is fully consistent with our results.

9 A number of studies [45–48], which caused some controversy [49–51], suggested that  
 10 hydroxyl radicals can be generated as a consequence of antibiotic treatments and this  
 11 aggressive by-product may take part in the killing mechanism of bactericidal drugs or  
 12 promote mutagenesis. Most of these studies were carried out in the iron-rich LB  
 13 medium and whether processes as described here for the interaction between an AMP  
 14 and iron apply to antibiotics remains to be explored.

## 15 **Conclusions**

16 Our results support the notion that under certain pathological situations, sub-  
 17 inhibitory concentrations of cAMPs facilitate uncontrolled uptake of free iron by  
 18 bacterial cells, which results in increased mutagenesis by Fenton reaction (figure 5).  
 19 According to our results, this could be a general mechanism underlying mutagenesis by  
 20 joint action of antimicrobial peptides and free iron in specific situations where iron is  
 21 not limited.

1 **Figure 5. A model for LL-37-mediated, iron-induced mutagenesis in *Pseudomonas***  
2 ***aeruginosa*.** The interactions of LL-37 with the membrane at sub-inhibitory  
3 concentrations lead to transient permeability changes in the membranes that promote  
4 iron movement in favour of the electrochemical gradient. Uncontrolled uptake of  
5 ferrous ions stimulates Fenton reaction that leads to hydroxyl radical formation and  
6 results in DNA damage and mutagenesis.

7 Free iron levels are kept as low as possible due to its toxic effect for all living beings but  
8 especially in bacteria that lack proper cell compartments. In fact, iron withdrawal is  
9 part of the natural innate immune response in inflammation that makes free iron even  
10 more scarce. During inflammation and infection a “hypoferremic response” (anaemia  
11 of inflammation) is observed [52,53]. Many chelating proteins such as transferrin and  
12 ferritin exhibit antibacterial activity simply by making iron availability incompatible  
13 with bacterial proliferation [54].

14 Despite showing that many cationic antimicrobial peptides are unable to increase  
15 mutation rates [7], the particular situation of iron-induced mutagenesis can be of great  
16 interest for certain types of infections where iron homeostasis is compromised. In  
17 cystic fibrosis, bleeding happens frequently. Considering that *P. aeruginosa* is one of  
18 the most common pathogens that acquire all antibiotic resistance by mutations, the  
19 mechanism proposed here is likely very relevant for pathoadaptation.

20 Finally, our work has potential implications for the development of future treatment of  
21 chronic respiratory infections by *Pseudomonas aeruginosa*. For example, modulation  
22 of iron-chelating agent in CF therapy could potentially slow down the pathoadaptation  
23 and development of resistance in CF, and diminish lung damaging by ROS.

# 1 **Materials and methods**

2 **Bacteria and growth conditions.** The *P. aeruginosa* PAO1 wild-type strain was kindly  
 3 provided by M. A. Jacobs. The *P. aeruginosa* PA14 was kindly provided by Nicole T.  
 4 Liberati and Frederick Ausubel. All bacterial strains were cultured in Mueller-Hinton  
 5 Broth, non-cation adjusted (Sigma), with total iron content  $0.22 \pm 0.02 \mu\text{M}$ , following  
 6 recommendations of CLSI for cationic antimicrobial peptide susceptibility testing. The  
 7 MHB pH was adjusted to 6 in all cases with acetic acid to enhance solubility of both, LL-  
 8 37 and iron compound. All experiments were performed at  $37^\circ\text{C}$ , under agitation in  
 9 liquid culture. For genetic manipulation, *Escherichia coli* DH5 $\alpha$  strain was used and  
 10 routinely cultured in Lysogeny Broth (LB medium), supplemented with antibiotic when  
 11 appropriate.

12 **Minimal inhibitory concentration (MIC).** MICs were determined according to CLSI  
 13 recommendations by a microdilution method with some modifications for  
 14 antimicrobial peptides. The MIC was defined as the antimicrobial concentration that  
 15 inhibited growth after 24 hours of incubation in liquid MHB medium at  $37^\circ\text{C}$ .  
 16 Polypropylene non-binding multi-well plates (Th. Geyer, Germany) were used for all  
 17 experiments.

18 **Determination of MIC50.** The MIC50s for all antimicrobials were determined by  
 19 inoculating strains grown to mid-log phase into the wells of a 96-microwell plate.  
 20 Approximately  $10^2$  cells from overnight cultures of PAO1 and PA14 strains were  
 21 inoculated into 50 ml tubes containing 10 ml of MBH and incubated at  $37^\circ\text{C}$  with  
 22 strong agitation until the mid-log phase of growth (approximately  $10^8$  cfu/ml). Then,  
 23  $100 \mu\text{l}$  of  $2 \times 10^8$  cells from these cultures were inoculated in each well of

1 polypropylene non-binding 96-multiwell plates containing 100  $\mu$ l of fresh Mueller-  
 2 Hinton medium with growing concentration of serially diluted LL-37. The plates were  
 3 incubated at 37°C during four hours with continuous agitation in a plate reader  
 4 (Synergy HT, BioTek). Four replicates per concentration were prepared and the  
 5 experiments were repeated twice. MIC50s at 4 hours were defined as the  
 6 concentrations at which 50% of growth reduction in comparison to the control at  
 7 OD<sub>600</sub> were observed.

8 **Estimation of mutant frequencies and mutation rates.** For spontaneous-mutation rate  
 9 measurements of PAO1 strain, 1/100 dilutions of overnight cultures were inoculated  
 10 into four tubes per group, each containing two ml of MHB medium. The cultures were  
 11 incubated at 37°C with strong agitation to reach  $\sim 10^8$  cfu/ml. At this point, appropriate  
 12 concentration of LL-37, colistin, iron sulphate (FeSO<sub>4</sub>) or combinations of antimicrobial  
 13 peptides and iron, were added to the cultures. The tubes were allowed to continue  
 14 their normal growth overnight until saturation. In the experiments with colistin, the  
 15 bacterial suspensions were washed twice with saline solution 0.9 % NaCl before  
 16 plating. The cultures were appropriately diluted and plated on MHB agar plates with or  
 17 without rifampicin (100  $\mu$ g/ml). The mutant frequency was estimated by the number  
 18 of colonies growing on rifampicin divided by the number of total cfu/ml. To confirm  
 19 the results, relevant concentrations were also assayed with ten replicates to see the  
 20 influence of the treatment on the population mutation rates (the number of mutations  
 21 per cell per generation). Mutation rates were calculated by maximum verisimilitude  
 22 method and data were processed using the on-line web-tool Falcor  
 23 (<http://www.mitochondria.org/protocols/FALCOR.html>) as recommended [55,56].  
 24 Falcor software was used to estimate the mutant frequency too. The mutation rates



for the strain PA14 under the selected treatments were determined in the same way as described for PAO1, but fosfomycin (128 µg/ml) was used instead of rifampicin.

**Sequencing of fosfomycin resistant mutants (Fos-R) and sequence analysis.** To assess the effects of iron and antimicrobial peptides and their combination on the mutation spectrum of *P. aeruginosa* strain PA14, the *glpT* gene of twenty randomly selected Fos-R clones from independent cultures for each treatment group (MHB supplemented either with 40 µM Fe<sup>2+</sup>, LL-37 (32 µg/ml) or a combination of LL-37+Fe<sup>2+</sup> at same concentrations for both), was amplified by colony PCR using *glpT*-P14-F1 (5-AGCGGAGCTCGCGATGTTC-3) and *glpT*-P14-R1 (5-TCAGCCGGCTTGCTGCGG-3) primers [36] and Kapa2G Fast ReadyMix PCR with dye kit (KAPA Biosystems, Boston, US). Cycling conditions were as follows: 95°C 7'/(95°C 15''/60°C 15''/72°C 40'')x 35/72°C 7'/4°C hold. The PCR products were purified and sequenced at Macrogen Europe using the forward and reverse primers described above. Sequences were assembled using SeqTrace software. Assembled sequences were imported into CLC Sequence Viewer 6 and aligned using default settings. Low quality flanking sequences were removed and the alignment was trimmed to the 1160 bp fragment (the 52-1212 bp region relative to the A in the start ATG codon of the 1347bp-long *glpT* ORF). A tridimensional homology model of GlpT was generated using Cn3D software by performing a BLASTP search using PA14 strain GlpT protein sequence as a query and mapping the resulting alignment against the experimentally determined *Escherichia coli* K-12 GlpT protein structure. To evaluate the potential effects of amino acid substitution on protein stability, the online tool I-Mutant (<http://gpcr2.biocomp.unibo.it/cgi/predictors/I-Mutant3.0/I-Mutant3.0.cgi>) was used. TMHMM server v. 2.0 (<http://www.cbs.dtu.dk/services/TMHMM/>) was used for prediction of

transmembrane helices in *glpT* protein sequence. Mutational spectrum differences were analysed using the software iMARS [39].

**Influence of 2-2' bipyridyl on LL-37+Fe<sup>2+</sup> mutagenesis.** The effect of 2-2' bipyridyl, an iron chelating agent, on LL-37+Fe<sup>2+</sup> mutagenesis was determined by measuring its influence on mutant frequency on a selected concentration of LL-37+Fe<sup>2+</sup> combination (32 µg/ml and 40 µM of Fe<sup>2+</sup> respectively), where mutagenesis was observed. The experiment consisted of adding a titrating concentration of 2-2' bipyridyl (114 µM) to chelate 95 % of the added iron of treated cultures, in order to make the treatment compatible with bacterial growth. Cultures with the described LL-37+Fe<sup>2+</sup> combination with no addition of 2-2' bipyridyl were used as a control. The mutant frequencies of both groups were determined as described elsewhere in this section. LL-37, iron and 2-2' bipyridyl were simultaneously added to the exponentially growing cultures.

**Cloning of *dps* gene and mutagenesis experiment.** DNA fragment containing the PAO1 *dps* gen from genomic DNAs was amplified by PCR using the oligonucleotides PA-DPS-F1 (5'-ATGGAAATCAATATCGGAATCG-3') and PA-DPS-R1 (5'-CTACTCAAATCAAGCGTTGGC-3') as forward and reverse primers, respectively. The fragment contains the ATG codon and 50 nucleotides downstream of the stop codon. The PCR product was directly cloned into the *Sma*I-digested and T-tailed pUCP24 plasmid vector (replicative in both *P. aeruginosa* and *E. coli*), which harbours Gentamicin resistance markers [57]. *E. coli* DH5α was used following standard protocols for genetic manipulations. The resulting plasmids, termed pUCP24-DPS, were introduced by electroporation into PAO1 wild type strain. The cloning vector was also transformed into the same strain as control. An experiment similar to the one designed for 2-2' bipyridyl was carried out. A mutagenic combination of LL-37+Fe<sup>2+</sup> was

1 assayed in the strains carrying pUCP24-DPS plasmid or the empty vector pUCP24 and  
2 mutant frequencies were determined for both groups.

3 **Quantification of iron concentrations.** Total iron quantification was carried out as  
4 previously described with minor modifications [58,59]. Cultures of *P. aeruginosa* PAO1  
5 were grown to an OD<sub>600</sub> of approximately 0.5 at 37°C with agitation in a volume of two  
6 ml in MHB. The cultures were centrifuged at 4000 *g* during ten minutes at 20°C. The  
7 pellets were re-suspended in fresh MHB and three different groups were prepared.  
8 The treatments consisted of LL-37 (32 µg/ml) (I), iron sulphate to a final concentration  
9 of 40 µM (II), a combination iron sulphate and LL-37 (III), both of them at the same  
10 concentrations of their respective group I and II, and a control group (IV) to which the  
11 proportional amounts of LL-37 and iron sulphate solvent were added (sterile dH<sub>2</sub>O and  
12 dH<sub>2</sub>O, pH=5 respectively). The cultures were incubated for up to 30 minutes and  
13 harvested by centrifugation as before but at 4°C. The cell pellets were washed twice  
14 with ice-cold phosphate-buffered saline (PBS) and re-suspended in 1 ml of TE buffer  
15 containing 5 mg/ml of egg lysozyme (Sigma) and incubated during 10 minutes at room  
16 temperature. To quantify total iron, the lysate (one ml) was mixed with one ml of HCl  
17 10 mM and 1 ml of iron-releasing reagent containing HCl 1.4 M + 4.5%  
18 (weight/volume) aqueous solution of KMnO<sub>4</sub>; 1/1 and incubated at 60°C for two hours.  
19 After cooling, 0.06 ml iron-detection reagent (6.5 mM ferrozine, 6.5 mM neocuproine,  
20 2.5 M ammonium acetate, 1 M ascorbic acid in water) was added and the sample  
21 absorbance was read at 550 nm in a plate reader Synergy HT (Biotek). The iron  
22 concentrations were determined based on a standard curve obtained with increasing  
23 concentrations of ferric chloride and normalized to protein concentration of the  
24 lysates. Each group consisted of five cultures. We determined the content of total iron

1 in our cultures media MHB and LB, using the same procedure describe above, starting  
2 by the addition of 1 ml of HCl 10 mM and 1 ml of the iron-releasing reagent. Under the  
3 suspicion that MHB had lower iron content, the samples of this medium were  
4 prepared ten-fold concentrated.

5 **Statistical analyses.** An unpaired Student's t test or Mann-Whitney U test was used  
6 where appropriate for statistical analysis, according to the nature of the data  
7 (parametric or nonparametric adjustment). Two-tailed Fisher's exact test or Monte  
8 Carlo hypergeometric test were used to calculate statistical significance of differences  
9 in mutation frequencies at each codon site of the alignment between treatments in  
10 the mutational spectrum analysis. P values less than 0.05 were considered statistically  
11 significant. All tests were performed with statistic software R except for mutational  
12 spectrum analysis where iMARS [39] was used instead.

13

14 **Acknowledgments.** We are grateful to Paul Johnston for comments on the manuscript.

## 15 **References**

- 16 1. Stover CK, Pham XQ, Erwin AL, Mizoguchi SD, Warrenner P, Hickey MJ, et al.  
17 Complete genome sequence of *Pseudomonas aeruginosa* PA01, an  
18 opportunistic pathogen. *Nature*. 2000/09/13 ed. 2000;406: 959–964.  
19 doi:10.1038/35023079
- 20 2. Hassett DJ, Korfhagen TR, Irvin RT, Schurr MJ, Sauer K, Lau GW, et al.  
21 *Pseudomonas aeruginosa* biofilm infections in cystic fibrosis: insights into  
22 pathogenic processes and treatment strategies. *Expert Opin Ther Targets*.  
23 2010/01/09 ed. 2010;14: 117–130. doi:10.1517/14728220903454988

- 1 3. Livermore DM. Multiple mechanisms of antimicrobial resistance in  
2 *Pseudomonas aeruginosa*: our worst nightmare? Clin Infect Dis. 2002;34: 634–  
3 40. doi:10.1086/338782
- 4 4. Rodríguez-Rojas A, Oliver A, Blázquez J. Intrinsic and environmental mutagenesis  
5 drive diversification and persistence of *Pseudomonas aeruginosa* in chronic lung  
6 infections. J Infect Dis. 2012;205: 121–7. doi:10.1093/infdis/jir690
- 7 5. Oliver A, Canton R, Campo P, Baquero F, Blazquez J. High frequency of  
8 hypermutable *Pseudomonas aeruginosa* in cystic fibrosis lung infection. Science  
9 (80- ). 2000/05/20 ed. 2000;288: 1251–1254. doi:8507 [pii]
- 10 6. Limoli DH, Rockel AB, Host KM, Jha A, Kopp BT, Hollis T, et al. Cationic  
11 antimicrobial peptides promote microbial mutagenesis and pathoadaptation in  
12 chronic infections. Ausubel FM, editor. PLoS Pathog. Public Library of Science;  
13 2014;10: e1004083. doi:10.1371/journal.ppat.1004083
- 14 7. Rodríguez-Rojas A, Makarova O, Rolff J. Antimicrobials, stress and mutagenesis.  
15 PLoS Pathog. 2014;10: e1004445. doi:10.1371/journal.ppat.1004445
- 16 8. Miller JH. Experiments in molecular genetics [Internet]. Cold Spring Harbor  
17 Laboratory; 1972. Available:  
18 [http://books.google.co.uk/books/about/Experiments\\_in\\_molecular\\_genetics.ht](http://books.google.co.uk/books/about/Experiments_in_molecular_genetics.html?id=PtVpAAAAMAAJ&pgis=1)  
19 [ml?id=PtVpAAAAMAAJ&pgis=1](http://books.google.co.uk/books/about/Experiments_in_molecular_genetics.html?id=PtVpAAAAMAAJ&pgis=1)
- 20 9. Abdul-Tehrani H, Hudson AJ, Chang YS, Timms AR, Hawkins C, Williams JM, et al.  
21 Ferritin mutants of *Escherichia coli* are iron deficient and growth impaired, and  
22 fur mutants are iron deficient. J Bacteriol. 1999;181: 1415–28. Available:  
23 [http://www.pubmedcentral.nih.gov/articlerender.fcgi?artid=93529&tool=pmce](http://www.pubmedcentral.nih.gov/articlerender.fcgi?artid=93529&tool=pmcentrez&rendertype=abstract)  
24 [ntrez&rendertype=abstract](http://www.pubmedcentral.nih.gov/articlerender.fcgi?artid=93529&tool=pmcentrez&rendertype=abstract)
- 25 10. Yang Y, Harris DP, Luo F, Xiong W, Joachimiak M, Wu L, et al. Snapshot of iron  
26 response in *Shewanella oneidensis* by gene network reconstruction. BMC  
27 Genomics. 2009;10: 131. doi:10.1186/1471-2164-10-131

- 1 11. Girardello R, Bispo PJM, Yamanaka TM, Gales AC. Cation concentration  
2 variability of four distinct Mueller-Hinton agar brands influences polymyxin B  
3 susceptibility results. J Clin Microbiol. 2012;50: 2414–8. doi:10.1128/JCM.06686-  
4 11
- 5 12. Imlay J, Chin S, Linn S. Toxic DNA damage by hydrogen peroxide through the  
6 Fenton reaction in vivo and in vitro. Science (80- ). 1988;240: 640–642.  
7 doi:10.1126/science.2834821
- 8 13. Andrews SC, Robinson AK, Rodríguez-Quiriones F. Bacterial iron homeostasis.  
9 FEMS Microbiol Rev. 2003;27: 215–37. Available:  
10 <http://www.ncbi.nlm.nih.gov/pubmed/12829269>
- 11 14. Yamamoto Y, Fukui K, Koujin N, Ohya H, Kimura K, Kamio Y. Regulation of the  
12 intracellular free iron pool by Dpr provides oxygen tolerance to Streptococcus  
13 mutans. J Bacteriol. 2004;186: 5997–6002. doi:10.1128/JB.186.18.5997-  
14 6002.2004
- 15 15. Reid DW, Carroll V, O'May C, Champion A, Kirov SM. Increased airway iron as a  
16 potential factor in the persistence of Pseudomonas aeruginosa infection in cystic  
17 fibrosis. Eur Respir J. 2007;30: 286–92. doi:10.1183/09031936.00154006
- 18 16. Reid DW, Carroll V, O'May C, Champion A, Kirov SM. Increased airway iron as a  
19 potential factor in the persistence of Pseudomonas aeruginosa infection in cystic  
20 fibrosis. Eur Respir J. 2007/05/17 ed. 2007;30: 286–292.  
21 doi:09031936.00154006 [pii] 10.1183/09031936.00154006
- 22 17. Worlitzsch D, Tarran R, Ulrich M, Schwab U, Cekici A, Meyer KC, et al. Effects of  
23 reduced mucus oxygen concentration in airway Pseudomonas infections of  
24 cystic fibrosis patients. J Clin Invest. 2002/02/06 ed. 2002;109: 317–325.  
25 doi:10.1172/JCI13870
- 26 18. Zasloff M. Antimicrobial peptides of multicellular organisms. Nature. 2002;415:  
27 389–95. doi:10.1038/415389a

19. Ratledge C, Dover LG. Iron metabolism in pathogenic bacteria. *Annu Rev Microbiol. Annual Reviews* 4139 El Camino Way, P.O. Box 10139, Palo Alto, CA 94303-0139, USA; 2000;54: 881–941. doi:10.1146/annurev.micro.54.1.881
20. Nasnas R, Saliba G, Hallak P. [The revival of colistin: an old antibiotic for the 21st century]. *Pathol Biol.* 2008/01/08 ed. 2009;57: 229–235. doi:S0369-8114(07)00223-4 [pii] 10.1016/j.patbio.2007.09.013
21. Biswas S, Brunel J-M, Dubus J-C, Reynaud-Gaubert M, Rolain J-M. Colistin: an update on the antibiotic of the 21st century. *Expert Rev Anti Infect Ther.* 2012;10: 917–34. doi:10.1586/eri.12.78
22. Colistin: An Update on the Antibiotic of the 21st Century [Internet]. [cited 27 Aug 2015]. Available: [http://www.medscape.com/viewarticle/772588\\_6](http://www.medscape.com/viewarticle/772588_6)
23. Hunter RC, Asfour F, Dingemans J, Osuna BL, Samad T, Malfroot A, et al. Ferrous iron is a significant component of bioavailable iron in cystic fibrosis airways. *MBio.* 2013;4: e00557–13–. doi:10.1128/mBio.00557-13
24. Kreamer NN, Costa F, Newman DK. The ferrous iron-responsive BqsRS two-component system activates genes that promote cationic stress tolerance. *MBio.* 2015;6: e02549. doi:10.1128/mBio.02549-14
25. Méhi O, Bogos B, Csörgő B, Pál F, Nyerges A, Papp B, et al. Perturbation of iron homeostasis promotes the evolution of antibiotic resistance. *Mol Biol Evol.* 2014;31: 2793–804. doi:10.1093/molbev/msu223
26. Wenzel M, Chiriac AI, Otto A, Zweytick D, May C, Schumacher C, et al. Small cationic antimicrobial peptides delocalize peripheral membrane proteins. *Proc Natl Acad Sci U S A.* 2014;111: E1409–18. doi:10.1073/pnas.1319900111
27. Goldman MJ, Anderson GM, Stolzenberg ED, Kari UP, Zasloff M, Wilson JM. Human beta-defensin-1 is a salt-sensitive antibiotic in lung that is inactivated in cystic fibrosis. *Cell.* 1997;88: 553–60. Available: <http://www.ncbi.nlm.nih.gov/pubmed/9038346>

- 1 28. McPhee JB, Bains M, Winsor G, Lewenza S, Kwasnicka A, Brazas MD, et al.  
2 Contribution of the PhoP-PhoQ and PmrA-PmrB two-component regulatory  
3 systems to Mg<sup>2+</sup>-induced gene regulation in *Pseudomonas aeruginosa*. J  
4 Bacteriol. 2006/05/19 ed. 2006;188: 3995–4006. doi:188/11/3995 [pii]  
5 10.1128/JB.00053-06
- 6 29. Moskowitz SM, Ernst RK, Miller SI. PmrAB, a two-component regulatory system  
7 of *Pseudomonas aeruginosa* that modulates resistance to cationic antimicrobial  
8 peptides and addition of aminoarabinose to lipid A. J Bacteriol. 2004;186: 575–  
9 9. Available:  
10 <http://www.pubmedcentral.nih.gov/articlerender.fcgi?artid=305751&tool=pmc>  
11 [entrez&rendertype=abstract](http://www.pubmedcentral.nih.gov/articlerender.fcgi?artid=305751&tool=pmc)
- 12 30. Marlovits TC, Haase W, Herrmann C, Aller SG, Unger VM. The membrane protein  
13 FeoB contains an intramolecular G protein essential for Fe(II) uptake in bacteria.  
14 Proc Natl Acad Sci U S A. 2002;99: 16243–8. doi:10.1073/pnas.242338299
- 15 31. Oliver A. High Frequency of Hypermutable *Pseudomonas aeruginosa* in Cystic  
16 Fibrosis Lung Infection. Science (80- ). 2000;288: 1251–1253.  
17 doi:10.1126/science.288.5469.1251
- 18 32. Couce A, Rodríguez-Rojas A, Blázquez J. Bypass of genetic constraints during  
19 mutator evolution to antibiotic resistance. Proc Biol Sci. 2015;282: 20142698.  
20 doi:10.1098/rspb.2014.2698
- 21 33. Imlay J a. Cellular defenses against superoxide and hydrogen peroxide. Annu Rev  
22 Biochem. 2008;77: 755–76. doi:10.1146/annurev.biochem.77.061606.161055
- 23 34. Rodríguez-Rojas A, Couce A, Blázquez J. Frequency of spontaneous resistance to  
24 fosfomycin combined with different antibiotics in *Pseudomonas aeruginosa*.  
25 Antimicrob Agents Chemother. 2010/08/18 ed. 2010;54: 4948–4949.  
26 doi:AAC.00415-10 [pii] 10.1128/AAC.00415-10
- 27 35. Rodríguez-Rojas A, Maciá MD, Couce A, Gómez C, Castañeda-García A, Oliver A,  
28 et al. Assessing the Emergence of Resistance: the Absence of Biological Cost in



- 1 vivo May Compromise Fosfomycin Treatments for *P. aeruginosa* Infections. PLoS  
2 One. 2010;(In press).
- 3 36. Castaneda-Garcia A, Rodriguez-Rojas A, Guelfo JR, Blazquez J. The Glycerol-3-  
4 Phosphate Permease GlpT Is the Only Fosfomycin Transporter in *Pseudomonas*  
5 *aeruginosa*. J Bacteriol. 2009/09/08 ed. 2009;191: 6968–6974. doi:JB.00748-09  
6 [pii] 10.1128/JB.00748-09
- 7 37. Rodriguez-Rojas A, Blazquez J. The *Pseudomonas aeruginosa* pfpl gene plays an  
8 antimutator role and provides general stress protection. J Bacteriol. 2008/11/26  
9 ed. 2009;191: 844–850. doi:JB.01081-08 [pii] 10.1128/JB.01081-08
- 10 38. Rodríguez-Rojas A, Maciá MD, Couce A, Gómez C, Castañeda-García A, Oliver A,  
11 et al. Assessing the emergence of resistance: the absence of biological cost in  
12 vivo may compromise fosfomycin treatments for *P. aeruginosa* infections. PLoS  
13 One. 2010;5: e10193. doi:10.1371/journal.pone.0010193
- 14 39. Morgan C, Lewis PD. iMARS - Mutation analysis reporting software: An analysis  
15 of spontaneous cII mutation spectra. Mutat Res - Genet Toxicol Environ  
16 Mutagen. 2006;603: 15–26. doi:10.1016/j.mrgentox.2005.09.010
- 17 40. McBride TJ, Preston BD, Loeb LA. Mutagenic spectrum resulting from DNA  
18 damage by oxygen radicals. Biochemistry. 1991;30: 207–13. Available:  
19 <http://www.ncbi.nlm.nih.gov/pubmed/1703014>
- 20 41. Juurik T, Ilves H, Teras R, Ilmjärv T, Tavita K, Ukkivi K, et al. Mutation frequency  
21 and spectrum of mutations vary at different chromosomal positions of  
22 *Pseudomonas putida*. PLoS One. 2012;7: e48511.  
23 doi:10.1371/journal.pone.0048511
- 24 42. Shee C, Gibson JL, Rosenberg SM. Two mechanisms produce mutation hotspots  
25 at DNA breaks in *Escherichia coli*. Cell Rep. 2012;2: 714–21.  
26 doi:10.1016/j.celrep.2012.08.033

- 1 43. Moyano AJ, Luján AM, Argaraña CE, Smania AM. MutS deficiency and activity of  
2 the error-prone DNA polymerase IV are crucial for determining mucA as the  
3 main target for mucoid conversion in *Pseudomonas aeruginosa*. *Mol Microbiol.*  
4 2007;64: 547–59. doi:10.1111/j.1365-2958.2007.05675.x
- 5 44. Lofton H, Pránting M, Thulin E, Andersson DI. Mechanisms and fitness costs of  
6 resistance to antimicrobial peptides LL-37, CNY100HL and wheat germ histones.  
7 *PLoS One*. 2013;8: e68875. doi:10.1371/journal.pone.0068875
- 8 45. Foti JJ, Devadoss B, Winkler JA, Collins JJ, Walker GC. Oxidation of the guanine  
9 nucleotide pool underlies cell death by bactericidal antibiotics. *Science*.  
10 2012;336: 315–9. doi:10.1126/science.1219192
- 11 46. Kohanski M a, DePristo M a, Collins JJ. Sublethal antibiotic treatment leads to  
12 multidrug resistance via radical-induced mutagenesis. *Mol Cell*. Elsevier Ltd;  
13 2010;37: 311–20. doi:10.1016/j.molcel.2010.01.003
- 14 47. Kohanski MA, Dwyer DJ, Hayete B, Lawrence CA, Collins JJ. A common  
15 mechanism of cellular death induced by bactericidal antibiotics. *Cell*.  
16 2007/09/07 ed. 2007;130: 797–810. doi:S0092-8674(07)00899-9 [pii]  
17 10.1016/j.cell.2007.06.049
- 18 48. Dwyer DJ, Kohanski MA, Collins JJ. Role of reactive oxygen species in antibiotic  
19 action and resistance. *Curr Opin Microbiol*. 2009/08/04 ed. 2009;12: 482–489.  
20 doi:S1369-5274(09)00090-3 [pii] 10.1016/j.mib.2009.06.018
- 21 49. Keren I, Wu Y, Inocencio J, Mulcahy LR, Lewis K. Killing by bactericidal antibiotics  
22 does not depend on reactive oxygen species. *Science*. 2013;339: 1213–6.  
23 doi:10.1126/science.1232688
- 24 50. Liu Y, Imlay J a. Cell Death from Antibiotics Without the Involvement of Reactive  
25 Oxygen Species. *Science (80- )*. 2013;339: 1210–1213.  
26 doi:10.1126/science.1232751

- 1 51. Imlay JA. Diagnosing oxidative stress in bacteria: not as easy as you might think.  
2 Curr Opin Microbiol. 2015;24C: 124–131. doi:10.1016/j.mib.2015.01.004
- 3 52. Ward CG, Bullen JJ, Rogers HJ. Iron and infection: new developments and their  
4 implications. J Trauma. 1996/08/01 ed. 1996;41: 356–364. Available:  
5 [http://www.ncbi.nlm.nih.gov/entrez/query.fcgi?cmd=Retrieve&db=PubMed&d](http://www.ncbi.nlm.nih.gov/entrez/query.fcgi?cmd=Retrieve&db=PubMed&dopt=Citation&list_uids=8760553)  
6 [opt=Citation&list\\_uids=8760553](http://www.ncbi.nlm.nih.gov/entrez/query.fcgi?cmd=Retrieve&db=PubMed&dopt=Citation&list_uids=8760553)
- 7 53. Wessling-Resnick M. Iron homeostasis and the inflammatory response. Annu  
8 Rev Nutr. 2010;30: 105–22. doi:10.1146/annurev.nutr.012809.104804
- 9 54. Skaar EP. The battle for iron between bacterial pathogens and their vertebrate  
10 hosts. PLoS Pathog. 2010;6: e1000949. doi:10.1371/journal.ppat.1000949
- 11 55. Couce A, Blazquez J. Estimating mutation rates in low-replication experiments.  
12 Mutat Res. 2011/07/09 ed. 2011;In Press. doi:S0027-5107(11)00147-3 [pii]  
13 10.1016/j.mrfmmm.2011.06.005
- 14 56. Hall BM, Ma C-X, Liang P, Singh KK. Fluctuation analysis CalculatOR: a web tool  
15 for the determination of mutation rate using Luria-Delbruck fluctuation analysis.  
16 Bioinformatics. 2009;25: 1564–5. doi:10.1093/bioinformatics/btp253
- 17 57. West SE, Schweizer HP, Dall C, Sample AK, Runyen-Janecky LJ. Construction of  
18 improved Escherichia-Pseudomonas shuttle vectors derived from pUC18/19 and  
19 sequence of the region required for their replication in Pseudomonas  
20 aeruginosa. Gene. 1994/10/11 ed. 1994;148: 81–86. doi:0378-1119(94)90237-2  
21 [pii]
- 22 58. Vilchèze C, Hartman T, Weinrick B, Jacobs WR. Mycobacterium tuberculosis is  
23 extraordinarily sensitive to killing by a vitamin C-induced Fenton reaction. Nat  
24 Commun. Nature Publishing Group, a division of Macmillan Publishers Limited.  
25 All Rights Reserved.; 2013;4: 1881. doi:10.1038/ncomms2898

59. Riemer J, Hoepken HH, Czerwinska H, Robinson SR, Dringen R. Colorimetric  
ferrozine-based assay for the quantitation of iron in cultured cells. Anal  
Biochem. 2004;331: 370–5. doi:10.1016/j.ab.2004.03.049

## Supplement figure and table legends

**Figure S1.** Different concentrations of LL-37 (from 4 to 32 µg/ml) have no impact on  
mutant frequencies to rifampicin of *P. aeruginosa* PAO1 in MHB. Error bars represent  
95 % confidence intervals for mutant frequencies.

**Figure S2.** Different concentrations of Fe<sup>2+</sup> have no impact on mutant frequencies to  
rifampicin of *P. aeruginosa* PAO1. Error bars represent 95 % confidence intervals for  
mutant frequencies.

**Figure S3.** Different concentrations of Fe<sup>2+</sup> increase mutant frequencies to rifampicin  
of *P. aeruginosa* PAO1 if LL-37 is present. The experiment was carried out at MIC50 for  
LL-37 (32 µg/ml). Error bars represent 95 % confidence intervals for mutant  
frequencies.

**Figure S4.** The combination of Fe<sup>2+</sup> (40 µM) and LL-37 (32 µg/ml) increases the mutant  
frequency of *P. aeruginosa* PA14 to fosfomycin. Error bars represent 95 % confidence  
intervals for mutant frequencies.

**Figure S5.** 3D-structural model of GlpT. A homology model of GlpT was generated  
using Cn3D software by performing a BLASTP search using PA14 GlpT protein sequence  
as a query and mapping the resulting alignment against the experimentally determined  
*Escherichia coli* K-12 GlpT protein structure. Substitutions found in Fos-R mutants in all  
treatments are highlighted in yellow.

1

2 **Figure S6.** DNA alignment of the 1160 bp fragment of *glpT* from twenty Fos-R *P.*  
3 *aeruginosa* PA14 clones treated with iron, LL-37 and LL-37+Fe<sup>2+</sup>. The 52-1212 bp region  
4 relative to the A in the start ATG codon of the 1347bp-long *glpT* ORF.

5

6 **Figure S7.** Mutation types in *glpT*. Prevalence of certain mutation types in iron, LL-37  
7 and LL-37+Fe<sup>2+</sup> treatments. C to T transitions was the most common type of nucleotide  
8 substitutions in LL-37+Fe<sup>2+</sup> treatment, but not in two other treatments.

9 **Table S1.** Mutations in *glpT* of Fos-R *P. aeruginosa* PA14 clones treated with iron, LL-37  
10 and LL-37+Fe<sup>2+</sup>.

11

12 **Table S2.** Two-tailed Fisher's exact-test of probability of having the same mutation in  
13 both LL-37 and iron treatments. H0 is rejected if  $P < 0.05$ .

14

15 **Table S3.** Two-tailed Fisher's exact-test of probability of having the same mutation in  
16 both LL-37 and LL-37+Fe<sup>2+</sup> treatments. H0 is rejected if  $P < 0.05$ . Mutation hotspots that  
17 significantly different are highlighted.

18

19

20 **Table S4.** Two-tailed Fisher's exact-test of probability of having the same mutation in  
21 both iron and LL-37+Fe<sup>2+</sup> treatments. H0 is rejected if  $P < 0.05$ . Mutation hotspots that  
22 significantly different are highlighted.

23

24

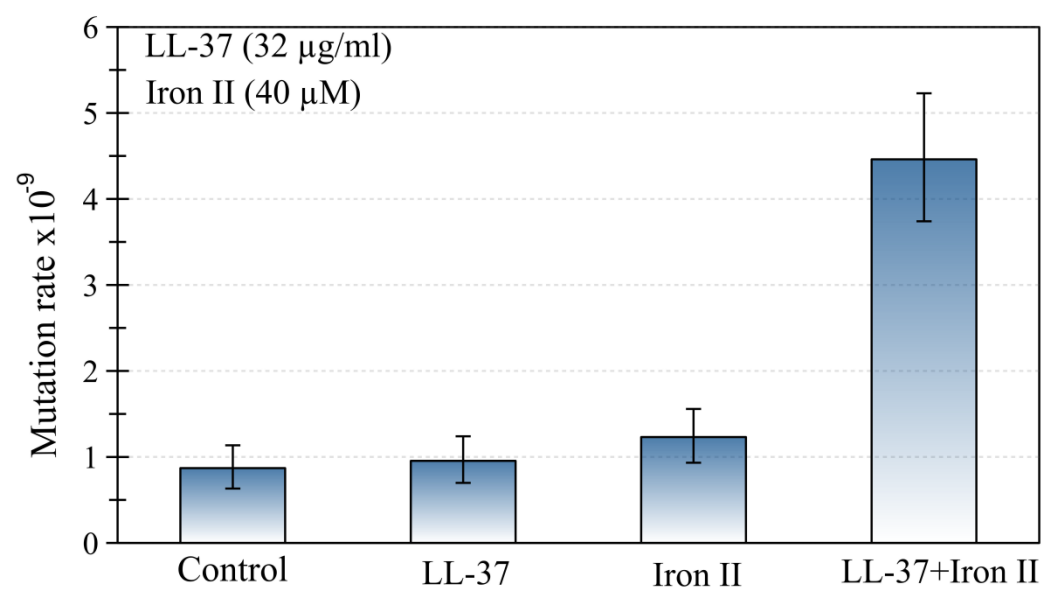

Figure 1.

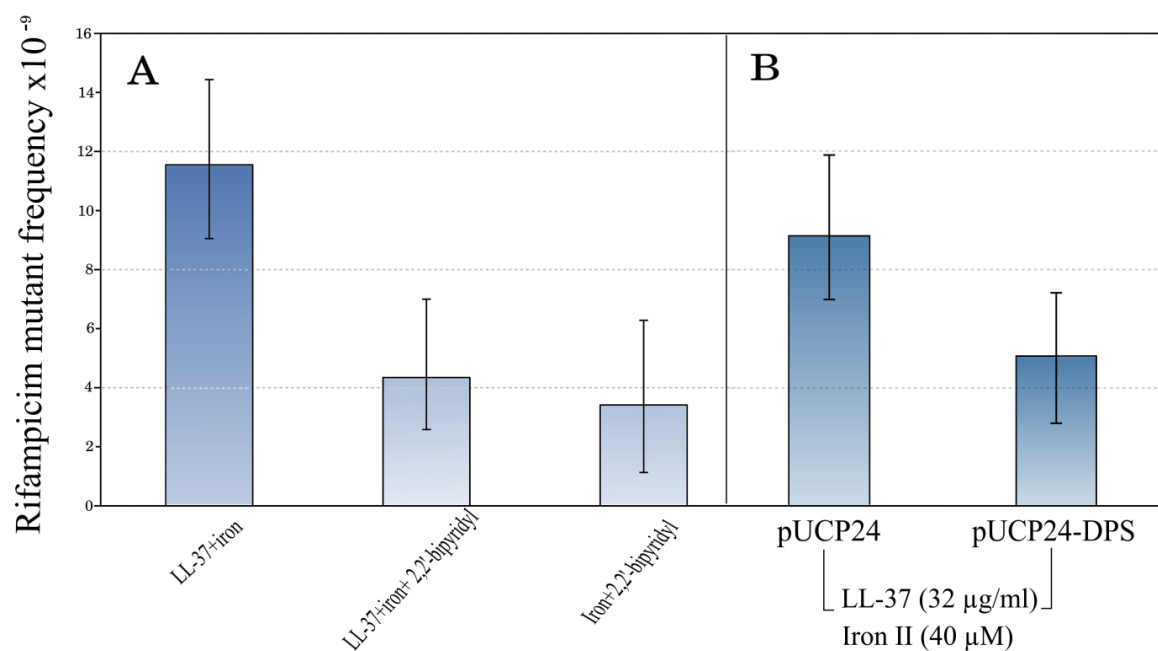

Figure 2.

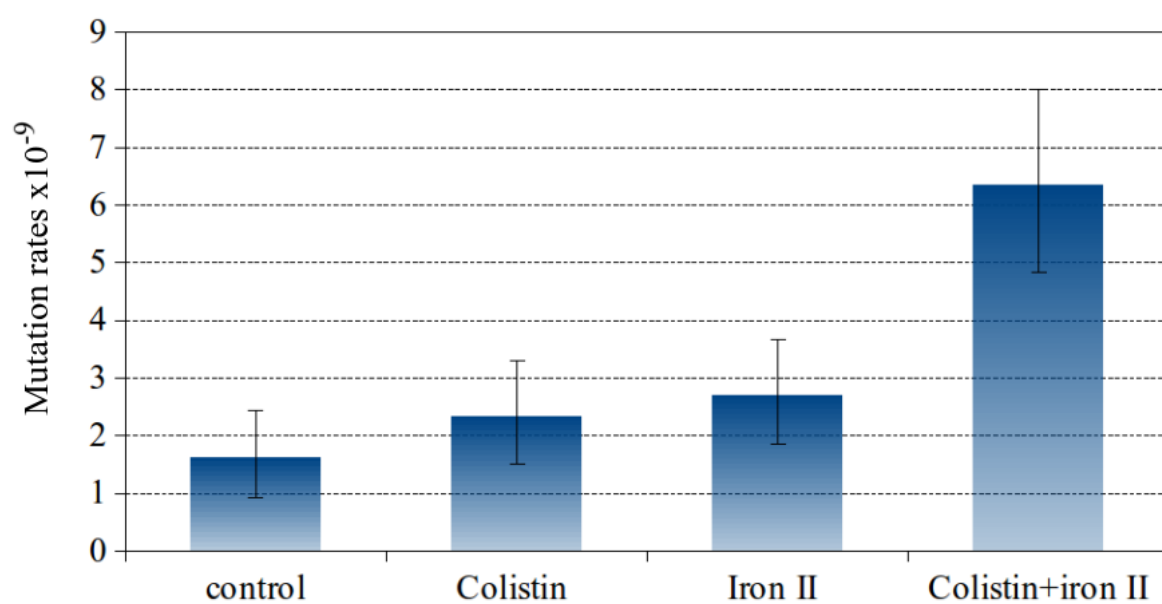

Figure 3.

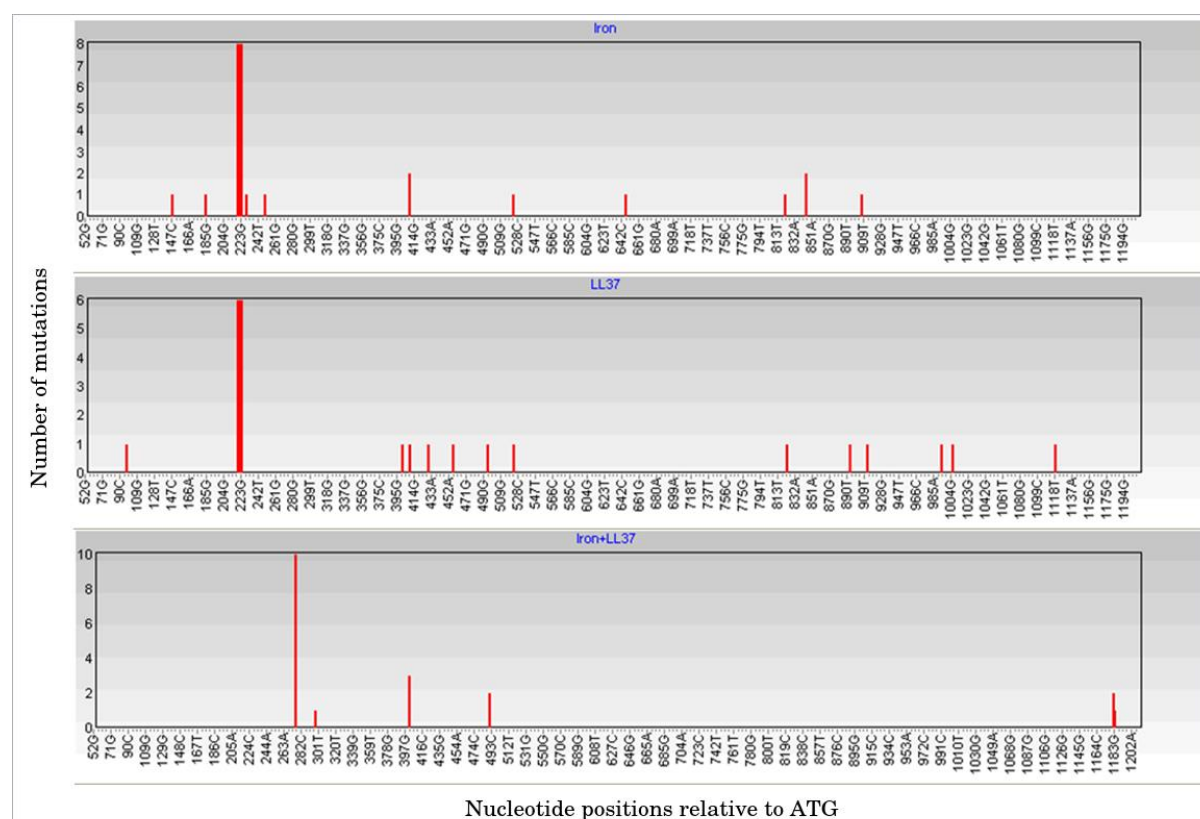

Figure 4.

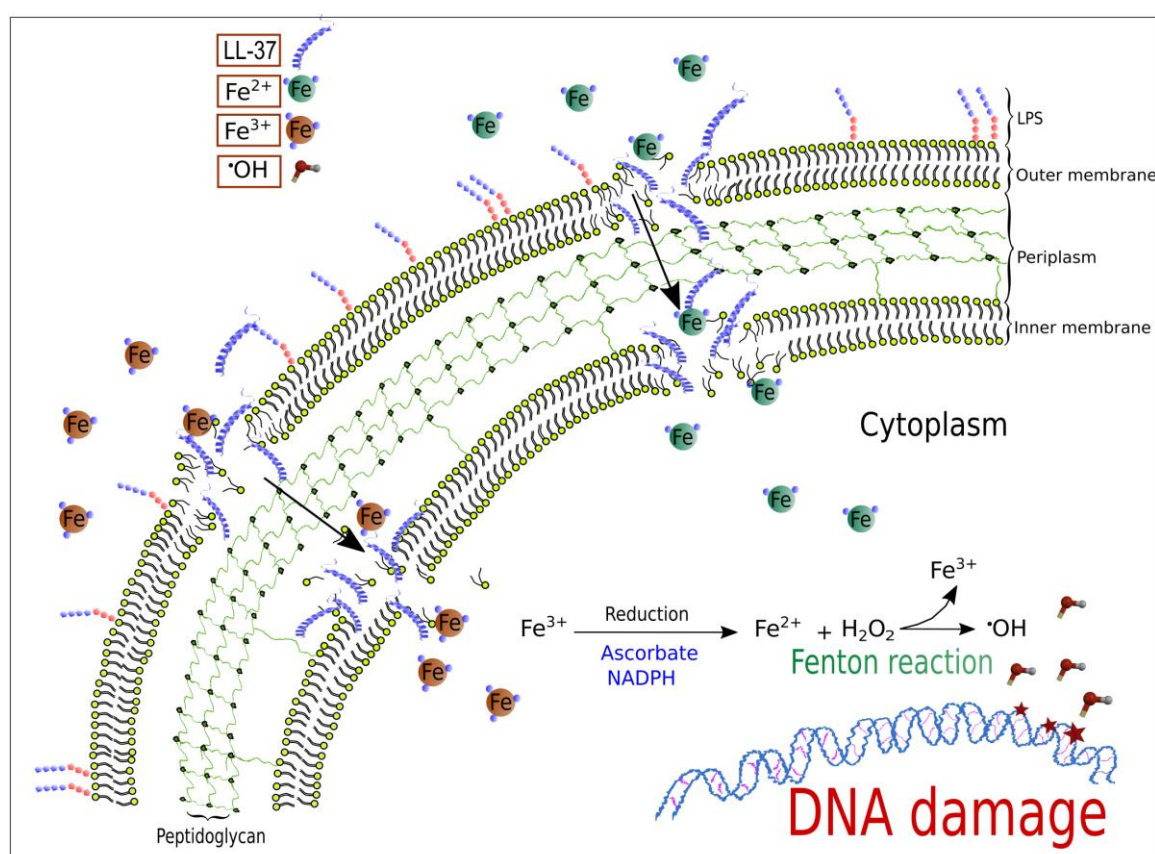

Figure 5.



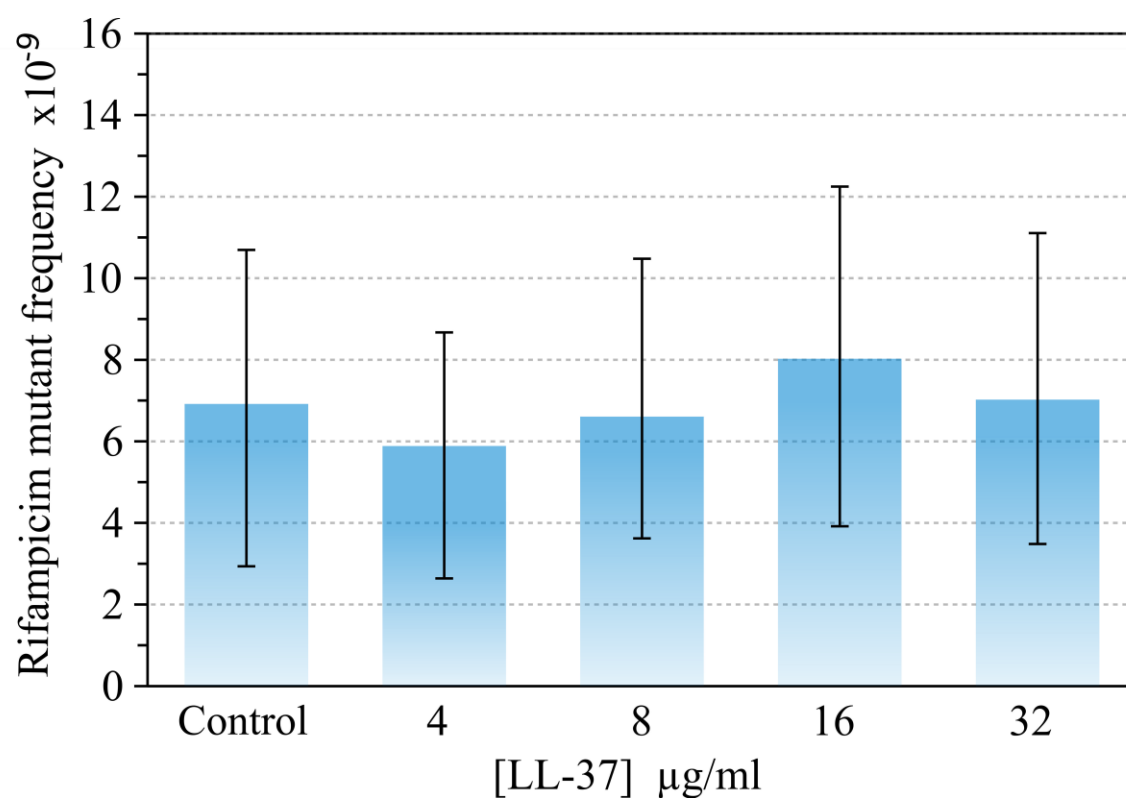

Figure S1.

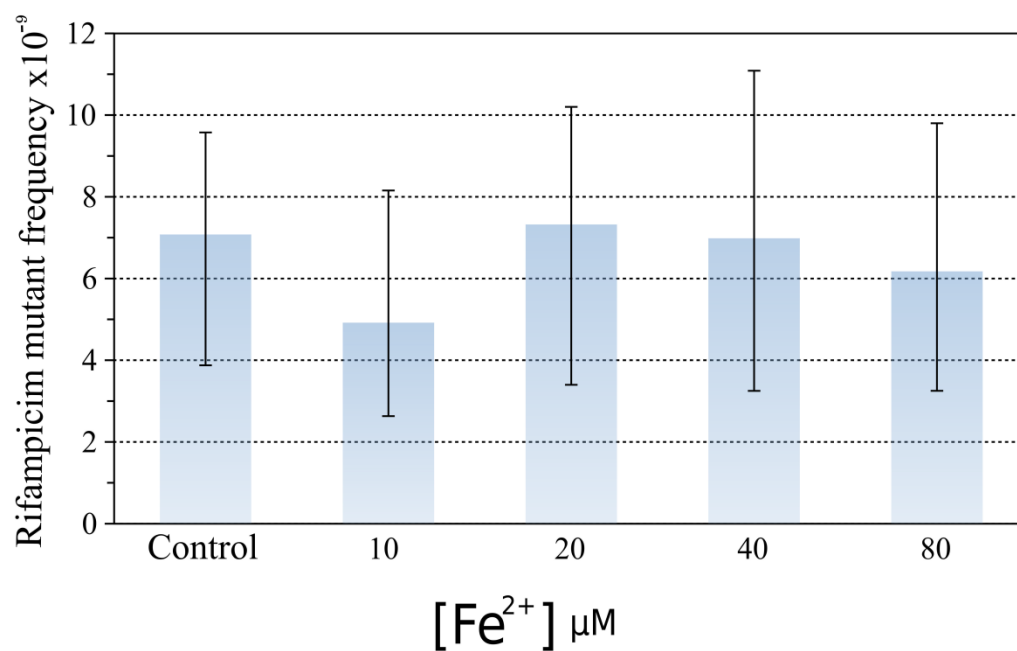

Figure S2.

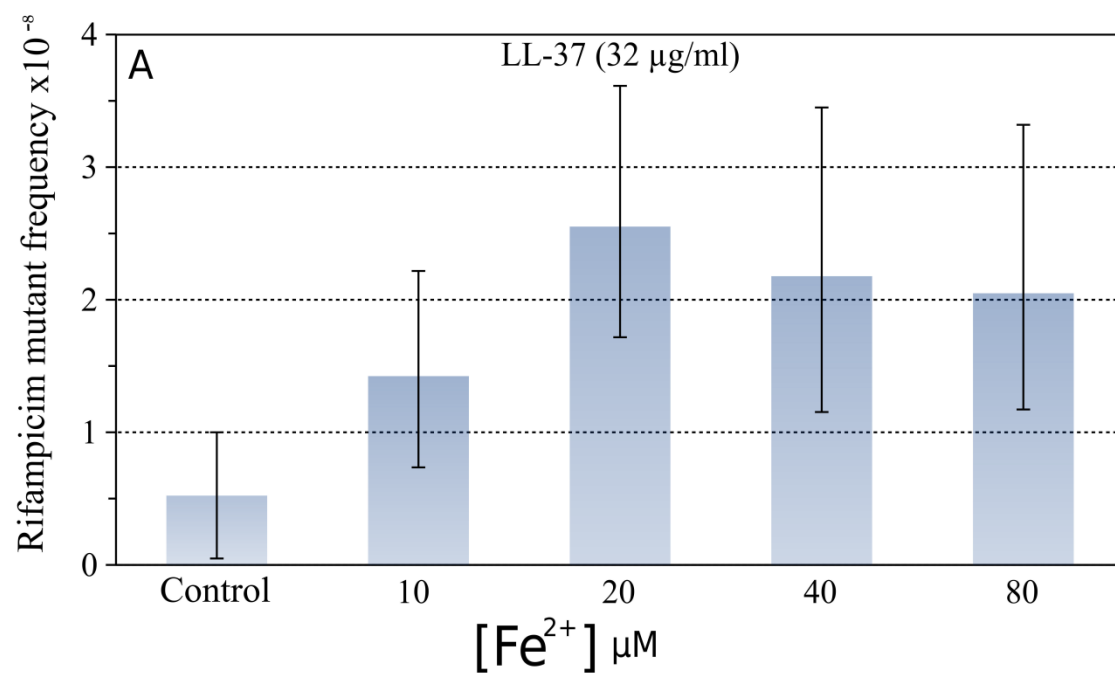

Figure S3.

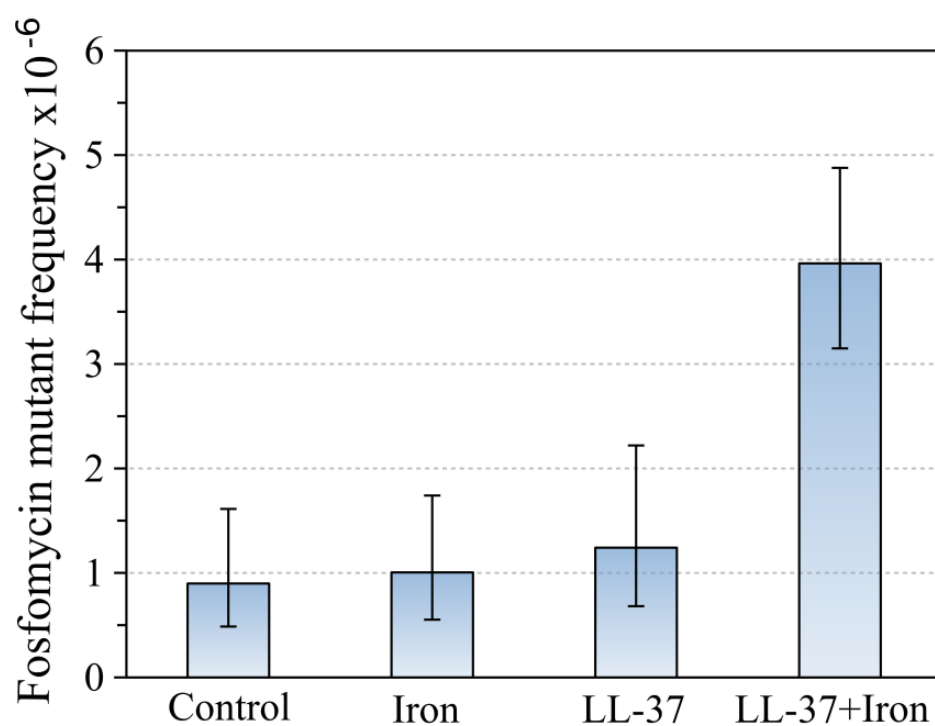

Figure S4.

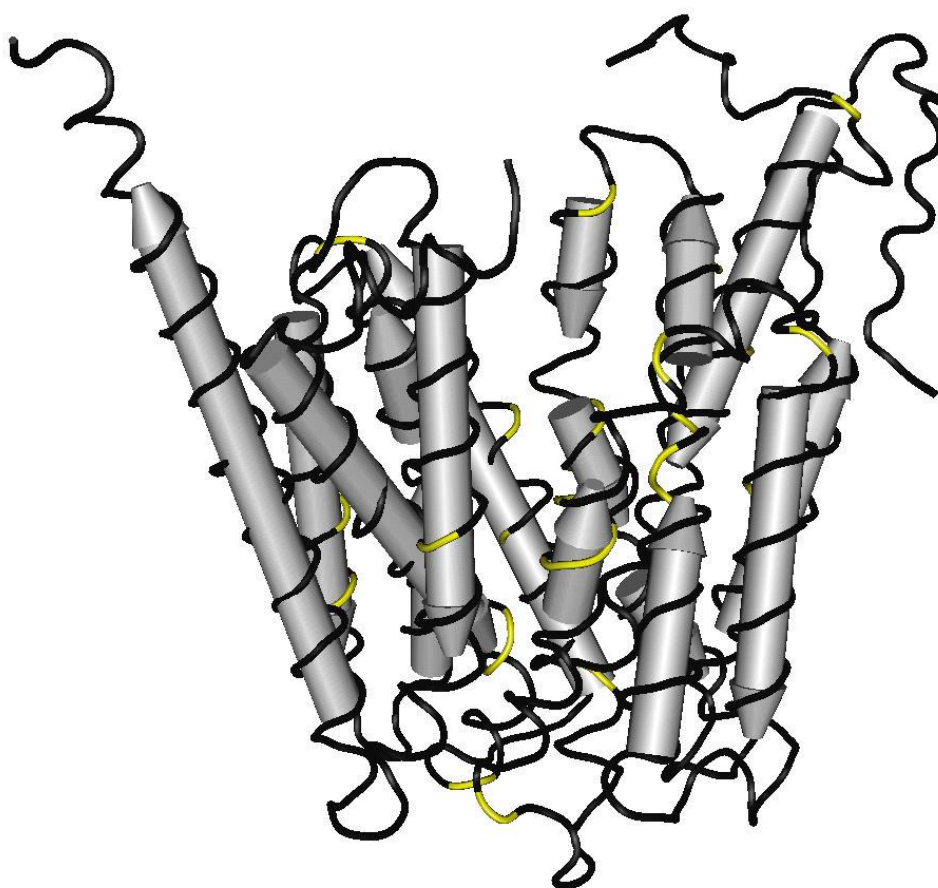

Figure S5.

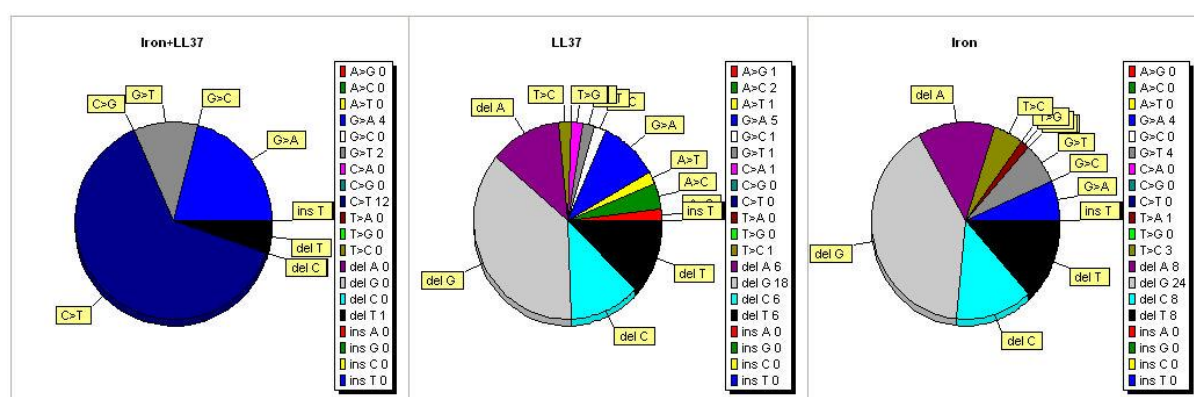

Figure S7.

**Table S1. Mutations in *glpT* of Fos-R *P. aeruginosa* PA14 clones treated with iron, LL-37 and LL-37+Fe<sup>2+</sup>**

| Treatment | Mutant number | Mutation position <sup>1</sup>     | Amino acid change <sup>2</sup> | Protein stability ddG Value <sup>3</sup> | Protein domain <sup>4</sup> |
|-----------|---------------|------------------------------------|--------------------------------|------------------------------------------|-----------------------------|
| Iron      | 1             | G230 to A transition               | G77 to D                       | -1.09 Large Decrease of Stability        | TMhelix                     |
|           | 2             | A220TCGCC225, deletion 6 bp        | deletion of I74- A75           | NA                                       | TMhelix                     |
|           | 3             | A846 to T transversion             | E282 to V                      | 0.08 Increase of Stability               | outside                     |
|           | 4             | G185 to A transition               | R62 to H                       | -1.33 Large Decrease of Stability        | outside                     |
|           | 5             | A846 to T transversion             | E282 to V                      | 0.08 Increase of Stability               | outside                     |
|           | 6             | G250 to T transversion             | G84 to C                       | -1.38Large Decrease of Stability         | TMhelix                     |
|           | 7             | G409 to A                          | G137 to S                      | -1.01 Large Decrease of Stability        | TMhelix                     |
|           | 8             | T908 to C transition               | I303 to T                      | -2.05 Large Decrease of Stability        | TMhelix                     |
|           | 9             | T823 to A transversion             | W275 to R                      | -1.09 Large Decrease of Stability        | outside                     |
|           | 10            | A220TCGCC225, deletion 6 bp        | deletion of I74- A75           | NA                                       | TMhelix                     |
|           | 11            | A220TCGCC225, deletion 6 bp        | deletion of I74- A75           | NA                                       | TMhelix                     |
|           | 12            | T149 to C transition               | L50 to P                       | -1.91 Large Decrease of Stability        | outside                     |
|           | 13            | A220TCGCC225, deletion 6 bp        | deletion of I74- A75           | NA                                       | TMhelix                     |
|           | 14            | A220TCGCC225, deletion 6 bp        | deletion of I74- A75           | NA                                       | TMhelix                     |
|           | 15            | A220TCGCC225, deletion 6 bp        | deletion of I74- A75           | NA                                       | TMhelix                     |
|           | 16            | A220TCGCC225, deletion 6 bp        | deletion of I74- A75           | NA                                       | TMhelix                     |
|           | 17            | A220TCGCC225, deletion 6 bp        | deletion of I74- A75           | NA                                       | TMhelix                     |
|           | 18            | G409 to T                          | G137 to C                      | -0.84 Large Decrease of Stability        | TMhelix                     |
|           | 19            | T524 to C transition               | L175 to P                      | -1.06 Large Decrease of Stability        | TMhelix                     |
|           | 20            | G647 to A transition               | G216 to D                      | -1.03 Large Decrease of Stability        | inside                      |
| LL-37     | 1             | A496 to G transition               | N166 to D                      | -0.08 Decrease of Stability              | TMhelix                     |
|           | 2             | A220TCGCC225, deletion 6 bp        | deletion of I74- A75           | NA                                       | TMhelix                     |
|           | 3             | A1006 to C transversion            | T336 to P                      | -0.70 Large Decrease of Stability        | TMhelix                     |
|           | 4             | A401 to T transversion             | Q134 to L                      | -0.10 Decrease of Stability              | TMhelix                     |
|           | 5             | A220TCGCC225, deletion 6 bp        | deletion of I74- A75           | NA                                       | TMhelix                     |
|           | 6             | T524 to C transition               | L175 to P                      | -1.06 Large Decrease of Stability        | TMhelix                     |
|           | 7             | A220TCGCC225, deletion 6 bp        | deletion of I74- A75           | NA                                       | TMhelix                     |
|           | 8             | C894 to A transversion, stop codon | Y298 to stop , truncation      | NA                                       | NA                          |
|           | 9             | A220TCGCC225, deletion 6 bp        | deletion of I74- A75           | NA                                       | TMhelix                     |

|                        |    |                                  |                           |                                    |         |
|------------------------|----|----------------------------------|---------------------------|------------------------------------|---------|
| LL-37+Fe <sup>2+</sup> | 10 | G98 to A transition              | G33 to D                  | -0.95, Large Decrease of Stability | TMhelix |
|                        | 11 | A220TCGCC225, deletion 6 bp      | deletion of I74- A75      | NA                                 | TMhelix |
|                        | 12 | G994 to C transversion           | V332 to L                 | -1.30 Large Decrease of Stability  | TMhelix |
|                        | 13 | G457 to A transition             | E153 to K                 | -0.70 Large Decrease of Stability  | inside  |
|                        | 14 | G409 to T                        | G137 to C                 | -0.84 Large Decrease of Stability  | TMhelix |
|                        | 15 | A430 to C transversion           | T144 to P                 | -0.39 Decrease of Stability        | inside  |
|                        | 16 | G1120 to A transition            | E374 to K                 | -0.49 Decrease of Stability        | Inside  |
|                        | 17 | G824 to A transition, stop codon | W275 to stop , truncation | NA                                 | outside |
|                        | 18 | A220TCGCC225, deletion 6 bp      | deletion of I74- A75      | NA                                 | TMhelix |
|                        | 19 | G913 to A transition             | G305 to S                 | -1.10 Large Decrease of Stability  | TMhelix |
|                        | 20 | G229 to A transition             | G77 to S                  | -1.23 Large Decrease of Stability  | TMhelix |
|                        | 1  | G403 to A transition             | G135 to S                 | -1.05 Large Decrease of Stability  | TMhelix |
|                        | 2  | C277 to T transition             | R93 to W                  | -0.57 Large Decrease of Stability  | inside  |
|                        | 2  | G403 to T transversion           | G135 to C                 | -0.90 Large Decrease of Stability  | TMhelix |
|                        | 3  | C822 to G transversion           | D274 to E                 | -0.08 Decrease of Stability        | outside |
|                        | 4  | C277 to T transition             | R93 to W                  | -0.57 Large Decrease of Stability  | inside  |
|                        | 5  | C277 to T transition             | R93 to W                  | -0.57 Large Decrease of Stability  | inside  |
|                        | 6  | G1183 to A transition            | G395 to S                 | -1.20 Large Decrease of Stability  | TMhelix |
|                        | 7  | C277 to T transition             | R93 to W                  | -0.57 Large Decrease of Stability  | inside  |
|                        | 8  | C277 to T transition             | R93 to W                  | -0.57 Large Decrease of Stability  | inside  |
|                        | 9  | C277 to T transition             | R93 to W                  | -0.57 Large Decrease of Stability  | inside  |
|                        | 10 | G1184 to A transition            | G395 to D                 | -0.85 Large Decrease of Stability  | TMhelix |
|                        | 11 | C491 to T transition             | A164 to V                 | 0.01 Increase of Stability         | TMhelix |
|                        | 12 | C491 to T transition             | A164 to V                 | 0.01 Increase of Stability         | TMhelix |
|                        | 13 | C822 to G transversion           | D274 to E                 | -0.08 Decrease of Stability        | outside |
|                        | 14 | C277 to T transition             | R93 to W                  | -0.57 Large Decrease of Stability  | inside  |
|                        | 15 | C277 to T transition             | R93 to W                  | -0.57 Large Decrease of Stability  | inside  |
|                        | 16 | C277 to T transition             | R93 to W                  | -0.57 Large Decrease of Stability  | inside  |
|                        | 17 | C277 to T transition             | R93 to W                  | -0.57 Large Decrease of Stability  | inside  |
|                        | 18 | T299, deletion 1bp, frameshift   | frameshift                | NA                                 | NA      |

|    |                       |           |                                   |         |
|----|-----------------------|-----------|-----------------------------------|---------|
| 19 | G1183 to A transition | G395 to S | -1.20 Large Decrease of Stability | TMhelix |
| 20 | G403 to T transition  | G135 to C | -0.90 Large Decrease of Stability | TMhelix |

<sup>1</sup> relative to the A in the start ATG codon of the 1347bp-long *glpT* ORF

<sup>2</sup> relative to the first amino acid of the GlpT protein

<sup>3</sup> ddG values are calculated using I-Mutant3.0 software for prediction of the protein stability change upon mutation, available from [http://gpcr.biocomp.unibo.it/~emidio/I-Mutant3.0/I-MutantDDG\\_Help.html](http://gpcr.biocomp.unibo.it/~emidio/I-Mutant3.0/I-MutantDDG_Help.html)

<sup>4</sup> location of transmembrane helices in proteins was predicted using TMHMM Server v. 2.0, available from <http://www.cbs.dtu.dk/services/TMHMM-2.0/>

**Table S2.**

| Mutation site              | Number of mutants per treatment |      | Two-tailed <i>P</i> -value | Interpretation                              |
|----------------------------|---------------------------------|------|----------------------------|---------------------------------------------|
|                            | LL-37                           | Iron |                            |                                             |
| G33 to D                   | 1                               | 0    | > 0.9999                   | The groups are not significantly different. |
| L50 to P                   | 0                               | 1    | > 0.9999                   | The groups are not significantly different. |
| R62 to H                   | 0                               | 1    | > 0.9999                   | The groups are not significantly different. |
| deletion of 6 bp I74 - A75 | 6                               | 8    | 0.7411                     | The groups are not significantly different. |
| G77 to D                   | 1                               | 1    | > 0.9999                   | The groups are not significantly different. |
| G84 to C                   | 0                               | 1    | > 0.9999                   | The groups are not significantly different. |
| R93 to W                   | 0                               | 0    | > 0.9999                   | The groups are not significantly different. |
| Q134 to L                  | 1                               | 0    | > 0.9999                   | The groups are not significantly different. |
| G135 to S                  | 0                               | 0    | > 0.9999                   | The groups are not significantly different. |
| G137 to S                  | 1                               | 2    | > 0.9999                   | The groups are not significantly different. |
| T299 frameshift            | 0                               | 0    | > 0.9999                   | The groups are not significantly different. |
| T144 to P                  | 1                               | 0    | > 0.9999                   | The groups are not significantly different. |
| E153 to K                  | 1                               | 0    | > 0.9999                   | The groups are not significantly different. |
| N166 to D                  | 1                               | 0    | > 0.9999                   | The groups are not significantly different. |
| A164 to V                  | 0                               | 0    | > 0.9999                   | The groups are not significantly different. |
| L175 to P                  | 1                               | 1    | > 0.9999                   | The groups are not significantly different. |
| G216 to D                  | 0                               | 1    | > 0.9999                   | The groups are not significantly different. |
| D274 to E                  | 0                               | 0    | > 0.9999                   | The groups are not significantly different. |
| W275 to R                  | 1                               | 1    | > 0.9999                   | The groups are not significantly different. |
| E282 to V                  | 0                               | 2    | 0.4872                     | The groups are not significantly different. |
| Y298 to stop, truncation   | 1                               | 0    | > 0.9999                   | The groups are not significantly different. |
| I303 to T                  | 0                               | 1    | > 0.9999                   | The groups are not significantly different. |
| G305 to S                  | 1                               | 0    | > 0.9999                   | The groups are not significantly different. |
| V332 to L                  | 1                               | 0    | > 0.9999                   | The groups are not significantly different. |
| T336 to P                  | 1                               | 0    | > 0.9999                   | The groups are not significantly different. |
| E374 to K                  | 1                               | 0    | > 0.9999                   | The groups are not significantly different. |
| G395 to S                  | 0                               | 0    | > 0.9999                   | The groups are not significantly different. |

**Table S3.**

| Mutation site              | Number of mutants per treatment |                        | Two-tailed <i>P</i> -value | Interpretation                              |
|----------------------------|---------------------------------|------------------------|----------------------------|---------------------------------------------|
|                            | LL-37                           | LL-37+Fe <sup>2+</sup> |                            |                                             |
| G33 to D                   | 1                               | 0                      | > 0.9999                   | The groups are not significantly different. |
| L50 to P                   | 0                               | 0                      | > 0.9999                   | The groups are not significantly different. |
| R62 to H                   | 0                               | 0                      | > 0.9999                   | The groups are not significantly different. |
| deletion of 6 bp I74 - A75 | 6                               | 0                      | 0.0202                     | The groups are significantly different.     |
| G77 to D                   | 1                               | 0                      | > 0.9999                   | The groups are not significantly different. |
| G84 to C                   | 0                               | 0                      | > 0.9999                   | The groups are not significantly different. |
| R93 to W                   | 0                               | 10                     | 0.0004                     | The groups are significantly different.     |
| Q134 to L                  | 1                               | 0                      | > 0.9999                   | The groups are not significantly different. |
| G135 to S                  | 0                               | 3                      | 0.2308                     | The groups are not significantly different. |
| G137 to S                  | 1                               | 0                      | > 0.9999                   | The groups are not significantly different. |
| T299 frameshift            | 0                               | 1                      | > 0.9999                   | The groups are not significantly different. |
| T144 to P                  | 1                               | 0                      | > 0.9999                   | The groups are not significantly different. |
| E153 to K                  | 1                               | 0                      | > 0.9999                   | The groups are not significantly different. |
| N166 to D                  | 1                               | 0                      | > 0.9999                   | The groups are not significantly different. |
| A164 to V                  | 0                               | 2                      | 0.4872                     | The groups are not significantly different. |
| L175 to P                  | 1                               | 0                      | > 0.9999                   | The groups are not significantly different. |
| G216 to D                  | 0                               | 0                      | > 0.9999                   | The groups are not significantly different. |
| D274 to E                  | 0                               | 2                      | 0.4872                     | The groups are not significantly different. |
| W275 to R                  | 1                               | 0                      | > 0.9999                   | The groups are not significantly different. |
| E282 to V                  | 0                               | 0                      | > 0.9999                   | The groups are not significantly different. |
| Y298 to stop, truncation   | 1                               | 0                      | > 0.9999                   | The groups are not significantly different. |
| I303 to T                  | 0                               | 0                      | > 0.9999                   | The groups are not significantly different. |
| G305 to S                  | 1                               | 0                      | > 0.9999                   | The groups are not significantly different. |
| V332 to L                  | 1                               | 0                      | > 0.9999                   | The groups are not significantly different. |
| T336 to P                  | 1                               | 0                      | > 0.9999                   | The groups are not significantly different. |
| E374 to K                  | 1                               | 0                      | > 0.9999                   | The groups are not significantly different. |
| G395 to S                  | 0                               | 3                      | 0.2308                     | The groups are not significantly different. |



**Table S4.**

| Mutation site              | Number of mutants per treatment |                        | Two-tailed <i>P</i> -value | Interpretation                              |
|----------------------------|---------------------------------|------------------------|----------------------------|---------------------------------------------|
|                            | Iron                            | LL-37+Fe <sup>2+</sup> |                            |                                             |
| G33 to D                   | 0                               | 0                      | > 0.9999                   | The groups are not significantly different. |
| L50 to P                   | 1                               | 0                      | > 0.9999                   | The groups are not significantly different. |
| R62 to H                   | 1                               | 0                      | > 0.9999                   | The groups are not significantly different. |
| deletion of 6 bp I74 - A75 | 8                               | 0                      | 0.0033                     | The groups are significantly different.     |
| G77 to D                   | 1                               | 0                      | > 0.9999                   | The groups are not significantly different. |
| G84 to C                   | 1                               | 0                      | > 0.9999                   | The groups are not significantly different. |
| R93 to W                   | 0                               | 10                     | 0.0004                     | The groups are significantly different.     |
| Q134 to L                  | 0                               | 0                      | > 0.9999                   | The groups are not significantly different. |
| G135 to S                  | 0                               | 3                      | 0.2308                     | The groups are not significantly different. |
| G137 to S                  | 2                               | 0                      | 0.4872                     | The groups are not significantly different. |
| T299 frameshift            | 0                               | 1                      | > 0.9999                   | The groups are not significantly different. |
| T144 to P                  | 0                               | 0                      | > 0.9999                   | The groups are not significantly different. |
| E153 to K                  | 0                               | 0                      | > 0.9999                   | The groups are not significantly different. |
| N166 to D                  | 0                               | 0                      | > 0.9999                   | The groups are not significantly different. |
| A164 to V                  | 0                               | 2                      | 0.4872                     | The groups are not significantly different. |
| L175 to P                  | 1                               | 0                      | > 0.9999                   | The groups are not significantly different. |
| G216 to D                  | 1                               | 0                      | > 0.9999                   | The groups are not significantly different. |
| D274 to E                  | 0                               | 2                      | 0.4872                     | The groups are not significantly different. |
| W275 to R                  | 1                               | 0                      | > 0.9999                   | The groups are not significantly different. |
| E282 to V                  | 2                               | 0                      | > 0.9999                   | The groups are not significantly different. |
| Y298 to stop, truncation   | 0                               | 0                      | > 0.9999                   | The groups are not significantly different. |
| I303 to T                  | 1                               | 0                      | > 0.9999                   | The groups are not significantly different. |
| G305 to S                  | 0                               | 0                      | > 0.9999                   | The groups are not significantly different. |
| V332 to L                  | 0                               | 0                      | > 0.9999                   | The groups are not significantly different. |
| T336 to P                  | 0                               | 0                      | > 0.9999                   | The groups are not significantly different. |
| E374 to K                  | 0                               | 0                      | > 0.9999                   | The groups are not significantly different. |
| G395 to S                  | 0                               | 3                      | 0.2308                     | The groups are not significantly different. |



|             |    |
|-------------|----|
| LL37Iron_18 | 90 |
| LL37Iron_19 | 90 |
| LL37Iron_20 | 90 |

[illegible]

|             |     |
|-------------|-----|
| LL37Iron_18 | 180 |
| LL37Iron_19 | 180 |
| LL37Iron_20 | 180 |

[illegible]

LL37Iron\_18 . . . . . 269  
LL37Iron\_19 . . . . . 270  
LL37Iron\_20 . . . . . 270

[illegible]



|             |               |     |
|-------------|---------------|-----|
| LL37Iron_18 | .....         | 359 |
| LL37Iron_19 | .....         | 360 |
| LL37Iron_20 | ..... T ..... | 360 |

9

LL37Iron\_18 . . . . . 449  
LL37Iron\_19 . . . . . 450  
LL37Iron\_20 . . . . . 450

[illegible]

LL37Iron\_18 . . . . . 539  
LL37Iron\_19 . . . . . 540  
LL37Iron\_20 . . . . . 540

13

LL37Iron\_18 . . . . . 629  
LL37Iron\_19 . . . . . 630  
LL37Iron\_20 . . . . . 630

[illegible]



|             |     |
|-------------|-----|
| LL37Iron_18 | 719 |
| LL37Iron_19 | 720 |
| LL37Iron_20 | 720 |

[illegible]

|             |     |
|-------------|-----|
| LL37Iron_18 | 809 |
| LL37Iron_19 | 810 |
| LL37Iron_20 | 810 |

19

|             |     |
|-------------|-----|
| LL37Iron_18 | 899 |
| LL37Iron_19 | 900 |
| LL37Iron_20 | 900 |

21

LL37Iron\_18 . . . . . 989  
LL37Iron\_19 . . . . . 990  
LL37Iron\_20 . . . . . 990

[illegible]



|             |     |      |
|-------------|-----|------|
| LL37Iron_18 | ... | 1079 |
| LL37Iron_19 | ... | 1080 |
| LL37Iron_20 | ... | 1080 |

25
